# Supplementary material for: Identification of novel circadian transcripts in the zebrafish retina
Source: Oxford University Press journal article supplement (doi:10.1242/jeb.192195), 2018-01-01
Supplement: jeb192195supp.pdf [file jeb192195supp.pdf]

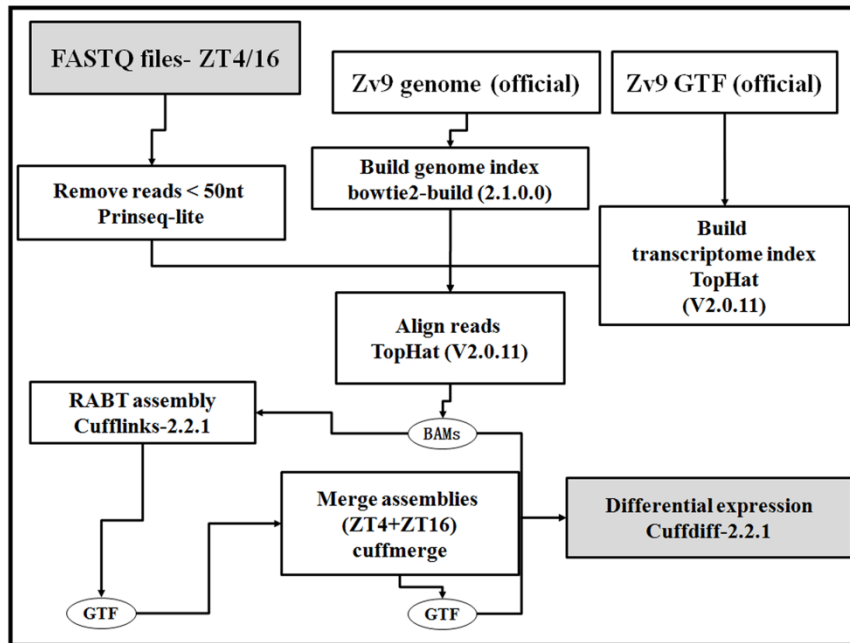

**Fig. S1. RNA-seq analysis work flow**

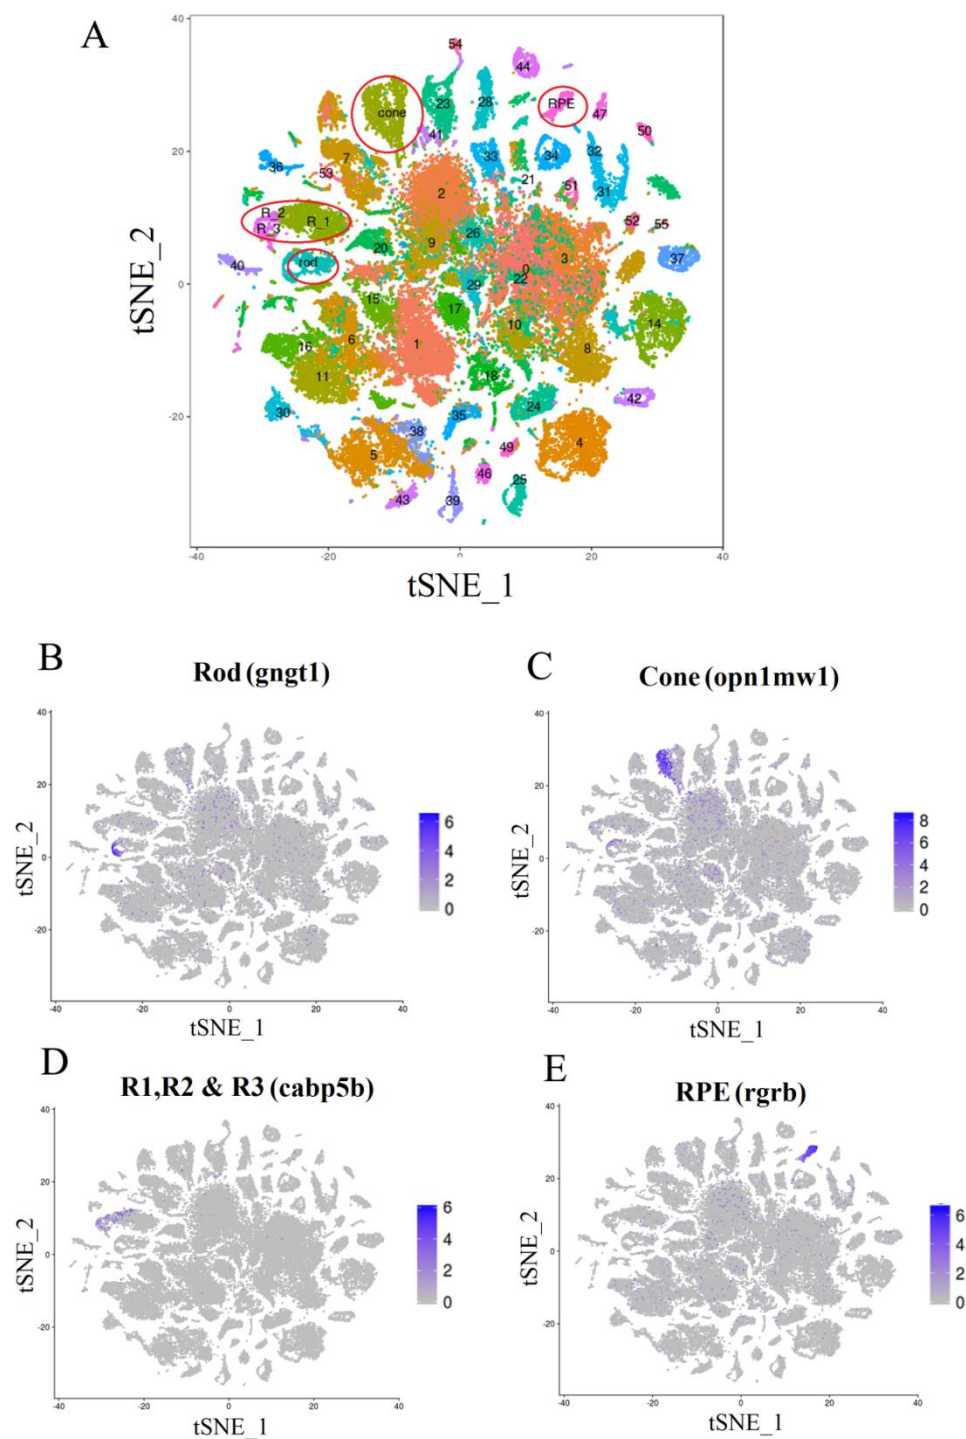

**Fig. S2. Single cell transcriptome based cell clusters and marker gene expression pattern**

A. tSNE representation of 55 distinct cell type clusters indicated by colour and numerical code. Retina associated cell type clusters were indicated by red circle. R\_1, R\_2 and R\_3 are clusters encompass cell types of INL.

B-C.tSNE representation of cell type specific marker gene expression

**Table S1.** list of differentially expressing genes

ZT4 (day) upregulated genes are unshaded, while dark shade indicates genes upregulated in ZT16(night), of which novel transcripts are highlighted by blue shade.

[Click here to Download Table S1](#)

**Table S2. qRT-PCR primers**

| Primer name | Sequence (5' to 3')      |
|-------------|--------------------------|
| pc1_F       | TGGACGGGGCATAAACATCC     |
| pc1_R       | GTGGACGGTAGAGCGTGTAG     |
| pc2_F       | TCCATCTCCATGGGGGACTT     |
| pc2_R       | CACGTATAGTTCGCCCTGCT     |
| pc3_F       | ACGCTATGGAAAGGTTTTGGT    |
| pc3_R       | ACCACTGTACTAGAGGGCAC     |
| pc4_F       | TGCTCTTCTTCTTGAGCATCATT  |
| pc4_R       | ACTTCATACTTGAGGTATCTACGG |
| pc5_F       | GTTTTCAGCACCGAGCGTTT     |
| pc5_R       | AGGCTTGCTGTACAAGGGAC     |

|          |                          |
|----------|--------------------------|
| pc6_F    | GGAACGCTTCCCGTGTTAATG    |
| pc6_R    | ATTCAAGCATCCTGCGTTTCC    |
| pc7_F    | ACTCGCTCGGAACCAGTAAA     |
| pc7_R    | CAGAGACGGAACCAGCACAC     |
| pc8_F    | ACATTACTGAGGCATGTTTCCTT  |
| pc8_R    | GTCTTCCTTTAGTTTTTGCACAGT |
| pc9_F    | ATGGATGGTCTTGGCACTGA     |
| pc9_R    | GCTAATAAGGCCTCCCCACT     |
| pc10_F   | CCACCCTTTCACCGCTTCTA     |
| pc10_R   | TGTCCGGGGATCAGAGATGT     |
| pc11_F   | CCCGGTTCAACGAACAGAAC     |
| pc11_R   | ACCGCCAAATGCCTTCTTCC     |
| pc12_F   | ATGGATGGTCTTGGCACTGA     |
| pc12_R   | GCTAATAAGGCCTCCCCACT     |
| pc13_F   | GAACGGGAATATCCGCGAGT     |
| pc13_R   | CAGGCTGTACAGTTCCCACA     |
| pc14_F   | TGCCAGTCTGGTGCAAGAAG     |
| pc14_R   | CCTCCACTGTAAGTGGGATCT    |
| aanat1_F | GGACCAGGACCGTCTGACT      |
| aanat1_R | CTGCAAGTAACGCCACAAGA     |
| aanat2_F | CGACGAAACAGCGGATGTTAG    |

|                 |                       |
|-----------------|-----------------------|
| aanat2_R        | GAACCTTTGAGCCTGTGATCG |
| per2_F          | CTCTGGACGGCAGTGAGAAT  |
| per2_R          | CACAGCACCTTCTGGATGTC  |
| $\beta$ actin_F | CTCTTCCAGCCTTCCTTCCT  |
| $\beta$ actin_R | CTTCTGCATACGGTCAGCAA  |

**Table S3. Primers used for making riboprobes**

| Primer name | Sequence (5' to 3')      |
|-------------|--------------------------|
| pc1_F       | ACGGAGGTTGCCGAAAGTAG     |
| pc1_R       | GCATCATGGCTGCGAAGTTT     |
| pc2_F       | TCCATCTCCATGGGGGACTT     |
| pc2_R       | GCATCTGTTGGTGTGATGCC     |
| pc5_F       | GGCACCGACCATATGGGAAA     |
| pc5_R       | TTGATGCATTTCCCCTCCCC     |
| pc6_F       | TGGCTCTTGTGGGTCAAATACA   |
| pc6_R       | CCGTTTGTCTGCATATAGGTGTAA |
| pc7_F       | CTTCCTGTCCACTGCGGTTC     |
| pc7_R       | TGTGTAGCGCATGCCTGAT      |
| pc8_F       | GGATGATGAAGGCGGTGAGAA    |
| pc8_R       | AGGTGCGACTCTAATCACATAC   |
| pc10_F      | TGTACTCCACCCTTTCACCG     |
| pc10_R      | GGCGGATGCTCTGTTTTAGC     |
| pc13_F      | GCGCGTTGTAGAATGACGGA     |
| pc13_R      | CAAGGTTTTAGGCTATCCGCAC   |
| aanat2_F    | CACCACTGAGACGAGCAGAC     |
| aanat2_R    | CAGCATCTGTCCAAACCCGA     |

**Table S4. Genomic co-ordinates of novel transcripts – Zv9**

| Transcript name | Genomic co-ordinates (zv9) used in GWIPs-viz |
|-----------------|----------------------------------------------|
| pc1             | chr10:33,745,072-33,753,939                  |
| pc2             | chr17:27,017,982-27,026,003                  |
| pc3             | chr19:17,538,911-17,539,312                  |
| pc4             | chr2:48,917,624-48,917,907                   |
| pc5             | chr21:8,040,849-8,046,112                    |
| pc6             | chr21:8,046,279-8,048,018                    |
| pc7             | chr12:48,295,723-48,428,717                  |
| pc8             | chr14:48,580,087-48,608,888                  |
| pc9             | chr24:27,725,833-27,730,072                  |
| pc10            | chr12:33,866,565-33,870,846                  |
| pc11            | chr12:33,868,347-33,870,846                  |
| pc12            | chr3:27,856,940-27,859,362                   |
| pc13            | chr8:1,433,308-1,434,308                     |
| pc14            | chr8:30,533,298-30,533,512                   |
